# Supplementary material for: Nanoscale cellular organization of viral RNA and proteins in SARS-CoV-2 replication organelles
Source: PubMed Central journal article supplement — bioRxiv. 2024 Apr 1:2023.11.07.566110. Originally published 2023 Nov 8. Preprint. [Version 3] doi: 10.1101/2023.11.07.566110 (PMC10659379; doi:10.1101/2023.11.07.566110), 2024-04-01
Supplement: media-1.pdf [file media-1.pdf]

# Supplementary figures

## **Nanoscale cellular organization of viral RNA and proteins in SARS-CoV-2 replication organelles**

Leonid Andronov\*<sup>1</sup>, Mengting Han\*<sup>2</sup>, Yanyu Zhu<sup>2</sup>, Anish R. Roy<sup>1</sup>, Andrew E. S. Barentine<sup>1</sup>, Jaishree Garhyan<sup>3</sup>, Lei S. Qi<sup>2,4,5</sup>, W.E. Moerner<sup>1,4</sup>

<sup>1</sup>Department of Chemistry; <sup>2</sup>Department of Bioengineering; <sup>3</sup>In Vitro Biosafety Level 3 (BSL-3) Service Center, School of Medicine; <sup>4</sup>Sarafan ChEM-H; Stanford University, Stanford, CA 94305 U.S.A. <sup>5</sup>Chan Zuckerberg Biohub – San Francisco, San Francisco, CA 94158 U.S.A.

\*These authors contributed equally.

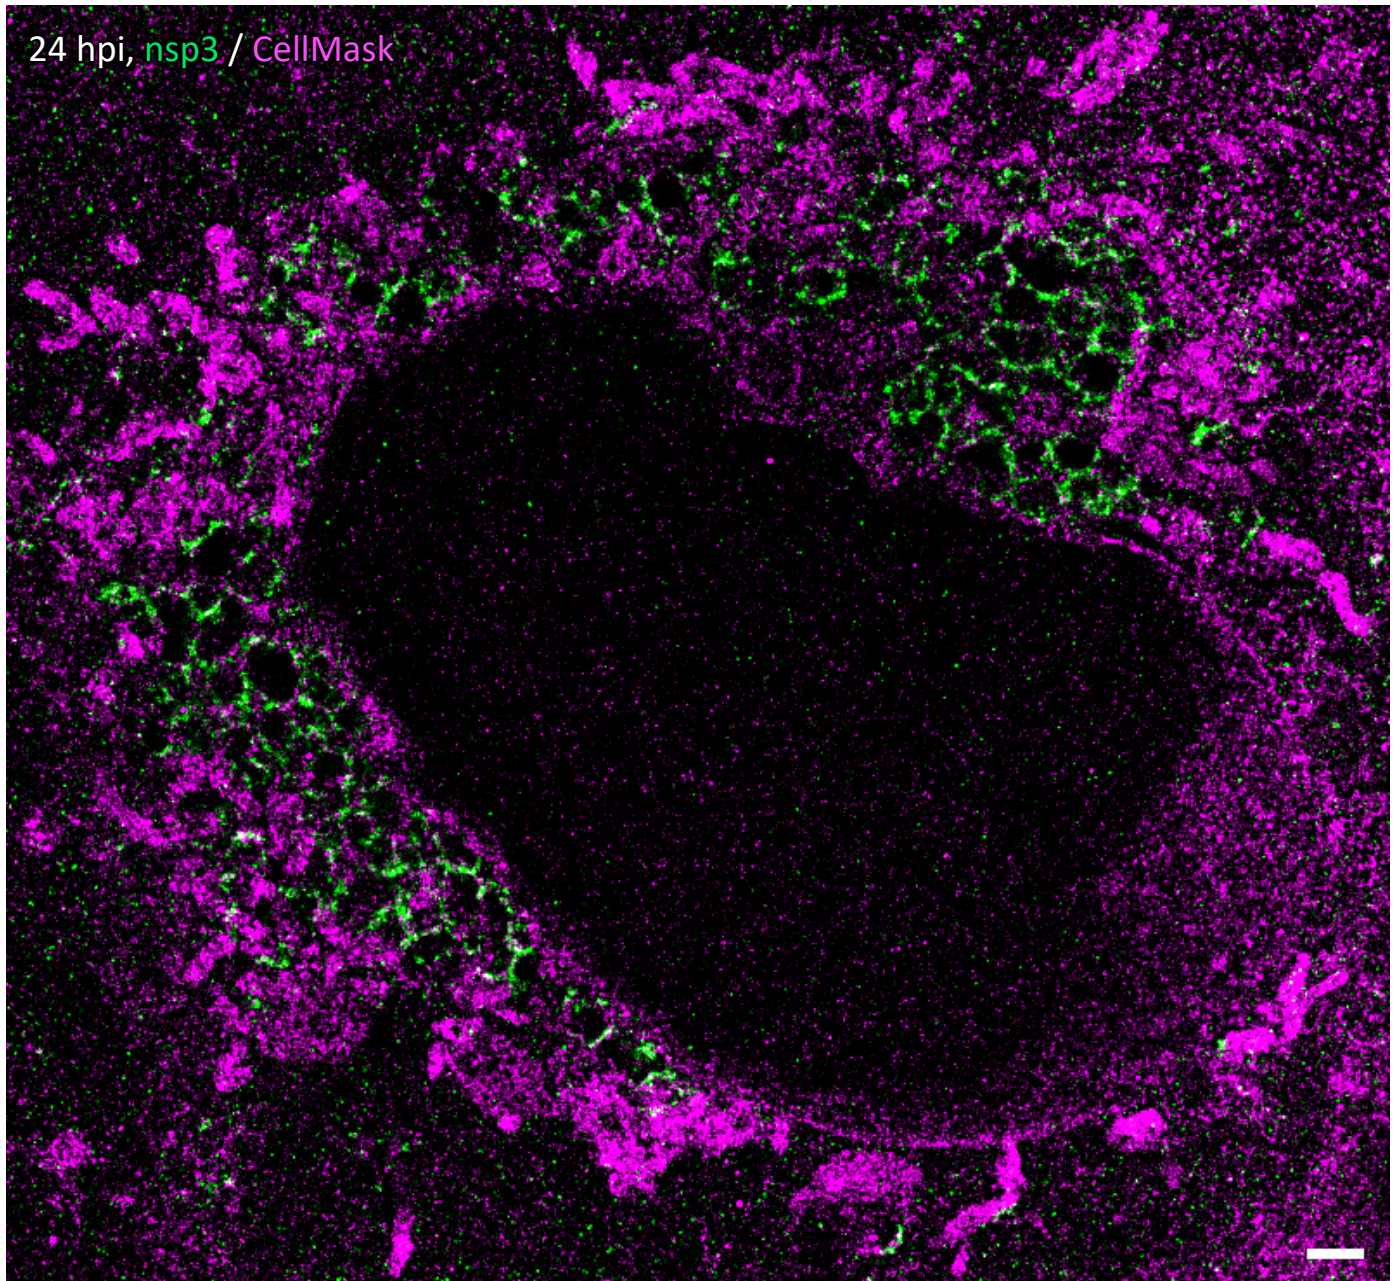

**Supplementary Fig. S1. Nanoscale colocalization of nsp3 with membranes at 24 hpi.**

SR image of nsp3 and membranes as labelled by CellMask in SARS-CoV-2 infected cells at 24 hpi. Nsp3 forms a network-like pattern in the perinuclear region that colocalizes with the CellMask pattern. Scale bar, 1  $\mu\text{m}$ .

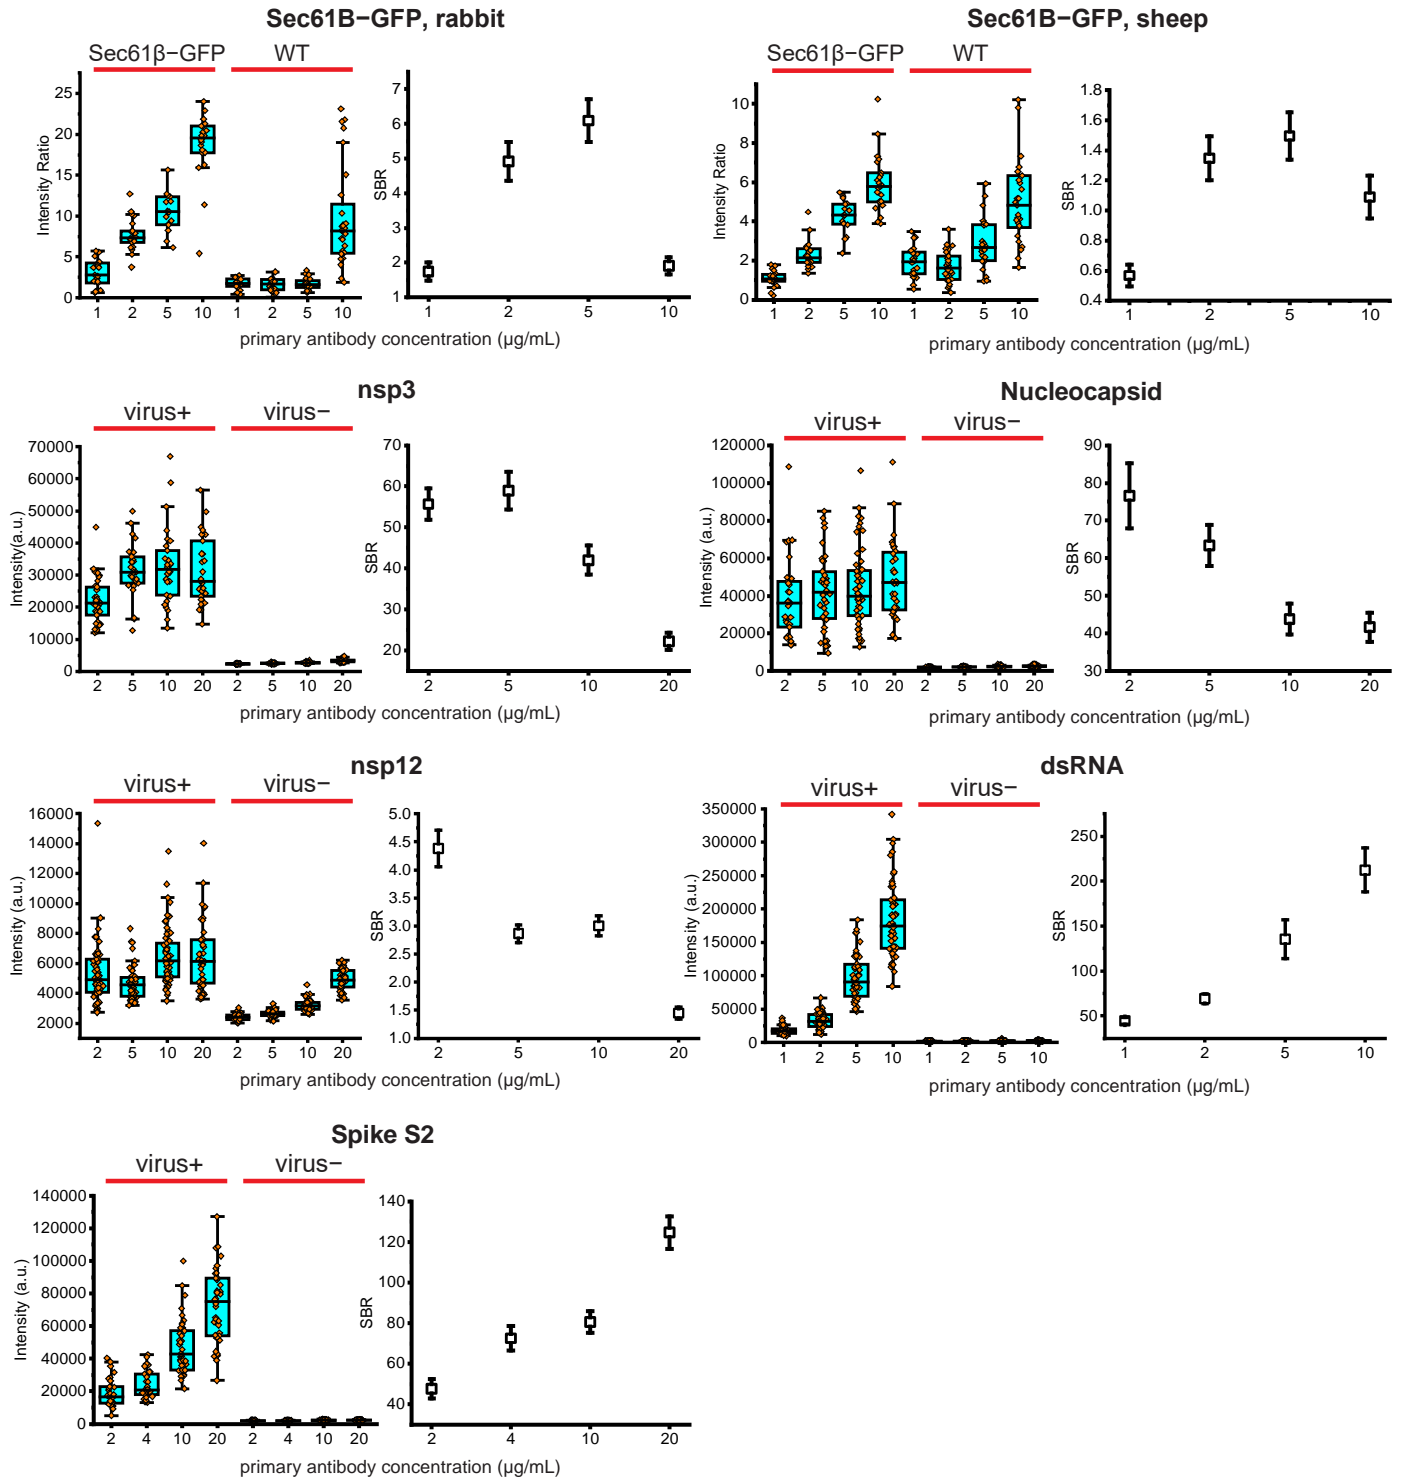

**Supplementary Fig. S2. Optimization of primary antibody concentrations.**

The concentration of primary antibodies was optimized to minimize the background or to maximize the signal to background ratio (SBR) between SARS-CoV-2 infected and non-infected cells or between cells expressing Sec61β-GFP and WT cells (see Methods)

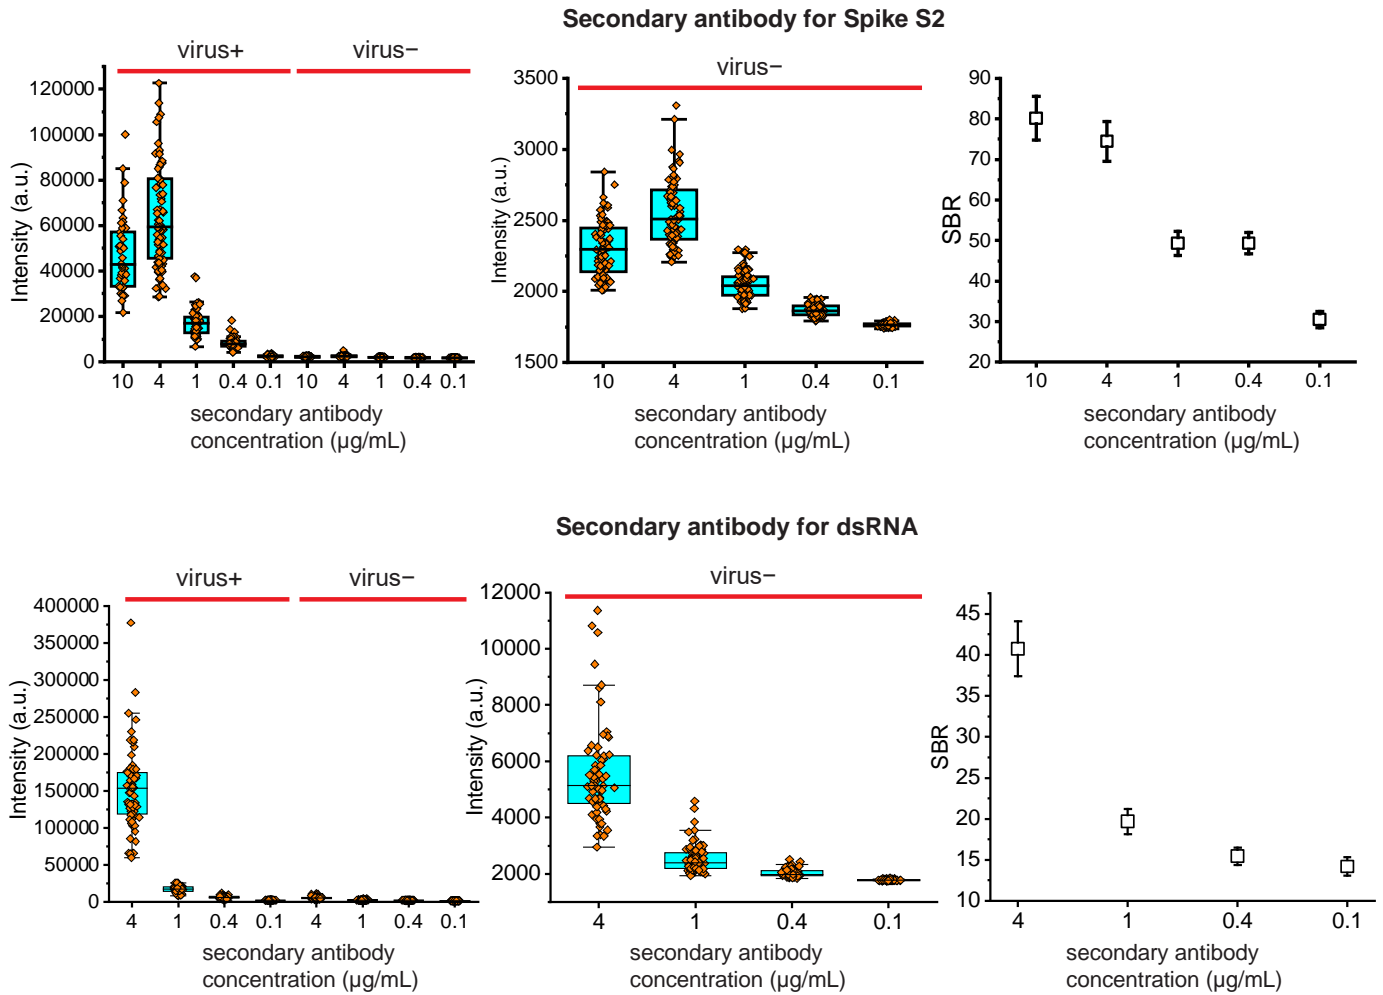

**Supplementary Fig. S3. Optimization of secondary antibody concentrations.**

The concentration of secondary antibodies was optimized to minimize the background or to maximize the SBR between SARS-CoV-2 infected and non-infected cells (see Methods).

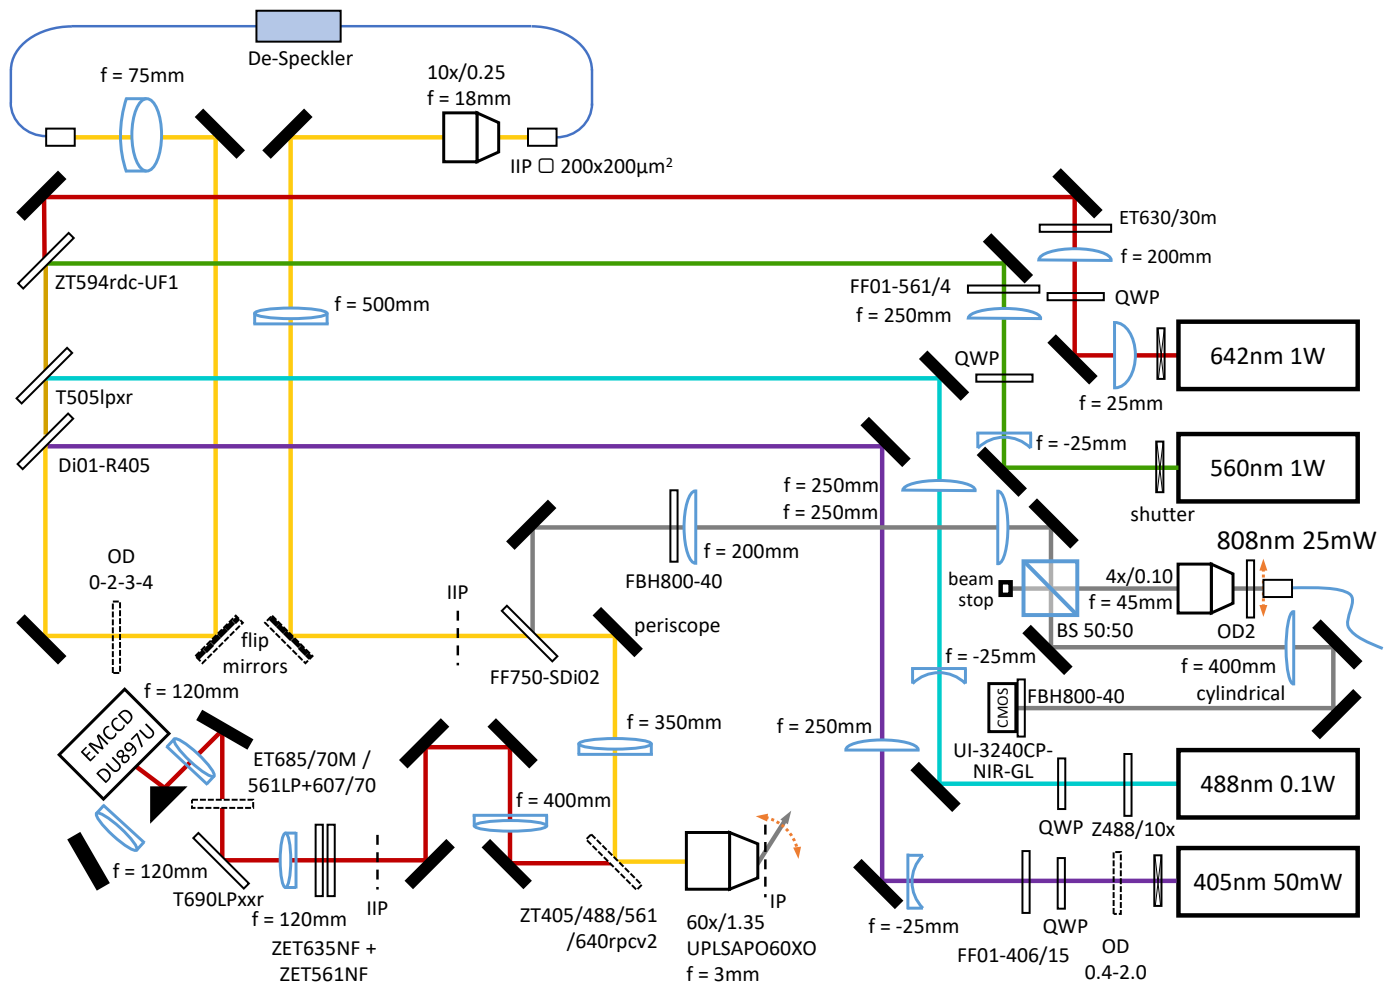

**Supplementary Fig. S4. Path diagram of SR microscope used in this study.**

Black-filled icons: mirrors; thin empty rectangles: dichroic or neutral density filters; dashed rectangles: movable or motorized components; boxes: cameras or lasers; bent lines: optical fiber; icons with blue edges: lenses or a beam splitter cube; QWP: quarter-wave plate; IP: image plane; IIP: intermediate image plane; BS: beam splitter; OD: optical density. Optics are shown for producing a second image on the EMCCD, but the second path was not used in this study. The gray lines denote the 808 nm beam in the focus lock apparatus.
